# Supplementary material for: A simple one-pot Adams method route to conductive high surface area IrO2–TiO2 materials
Source: Royal Society of Chemistry journal article supplement (doi:10.1039/c5nj02400e), 2015-12-24
Supplement: c5nj02400e1.pdf [file c5nj02400e1.pdf]

## SUPPORTING INFORMATION

### A Simple One-Pot Adams Method Route to Conductive High Surface Area IrO<sub>2</sub>-TiO<sub>2</sub> Materials

Emma Oakton,<sup>a</sup> Dmitry Lebedev,<sup>a</sup> Alexey Fedorov,<sup>a</sup> Frank Krumeich,<sup>a</sup> Jeremy Tillier,<sup>b</sup> Olha Sereda,<sup>b</sup> Thomas J. Schmidt<sup>a,c</sup> and Christophe Copéret<sup>a\*</sup>

<sup>a</sup> ETH Zürich, Department of Chemistry and Applied Biosciences, Vladimir Prelog Weg 2, CH-8093 Zürich, Switzerland. Fax: 41 44 633 1325; Tel: 41 44 633 9394; E-mail: ccoperet@inorg.chem.ethz.ch

<sup>b</sup> CSEM SA, XRD Application Lab & Microscopy, Jaquet-Droz 1, CH-2002, Neuchâtel, Switzerland.

<sup>c</sup> Electrochemistry Laboratory, Paul Scherrer Institute, CH-5232, Villigen PSI, Switzerland.

#### Characterisation data

|                                                                                                                                                                                                                                                                   |   |
|-------------------------------------------------------------------------------------------------------------------------------------------------------------------------------------------------------------------------------------------------------------------|---|
| <b>Figure S1.</b> Bright Field TEM images of a) TiO <sub>2</sub> and b) 5%IrO <sub>2</sub> -95%TiO <sub>2</sub> .....                                                                                                                                             | 2 |
| <b>Figure S2.</b> Powder XRD diffraction patterns of various additional IrO <sub>2</sub> -TiO <sub>2</sub> compositions with reference patterns of anatase TiO <sub>2</sub> (green), rutile TiO <sub>2</sub> (blue) and IrO <sub>2</sub> (red) respectively ..... | 3 |
| <b>Figure S3.</b> a) HAADF-STEM image of 40%IrO <sub>2</sub> -60%TiO <sub>2</sub> and b) EDX map showing areas containing Ir (red) and Ti (green).....                                                                                                            | 4 |
| <b>Figure S4.</b> Representative N <sub>2</sub> adsorption-desorption isotherm for 40%IrO <sub>2</sub> -60%TiO <sub>2</sub> .....                                                                                                                                 | 4 |

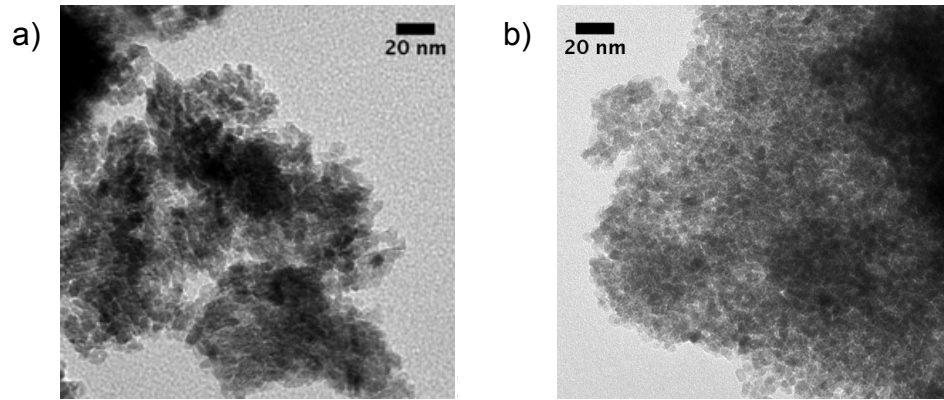

**Figure S1.** Bright Field TEM images of a)  $\text{TiO}_2$  and b)  $5\%\text{IrO}_2\text{-}95\%\text{TiO}_2$

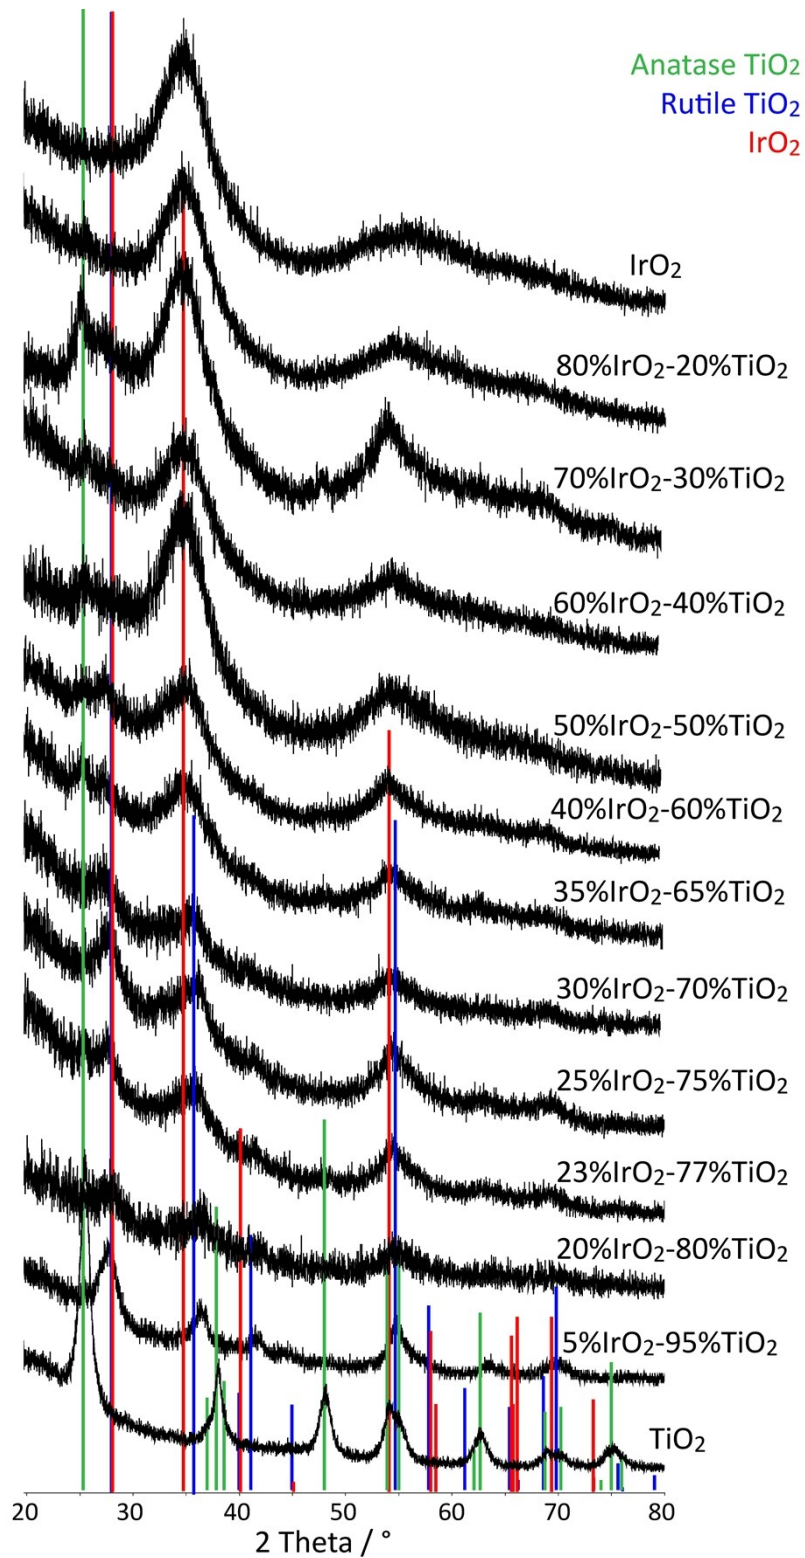

**Figure S2.** Powder XRD diffraction patterns of various additional IrO<sub>2</sub>-TiO<sub>2</sub> compositions with reference patterns of anatase TiO<sub>2</sub> (green), rutile TiO<sub>2</sub> (blue) and IrO<sub>2</sub> (red) respectively

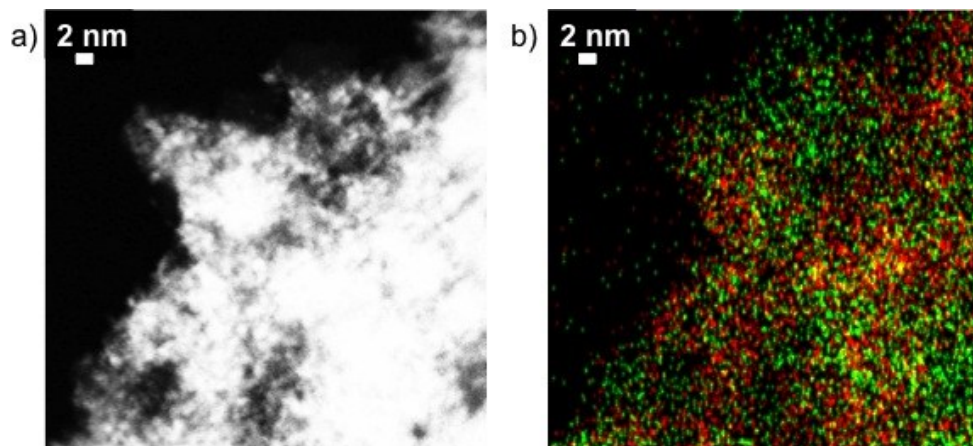

**Figure S3.** a) HAADF-STEM image of 40%IrO<sub>2</sub>-60%TiO<sub>2</sub> and b) EDX map showing areas containing Ir (red) and Ti (green)

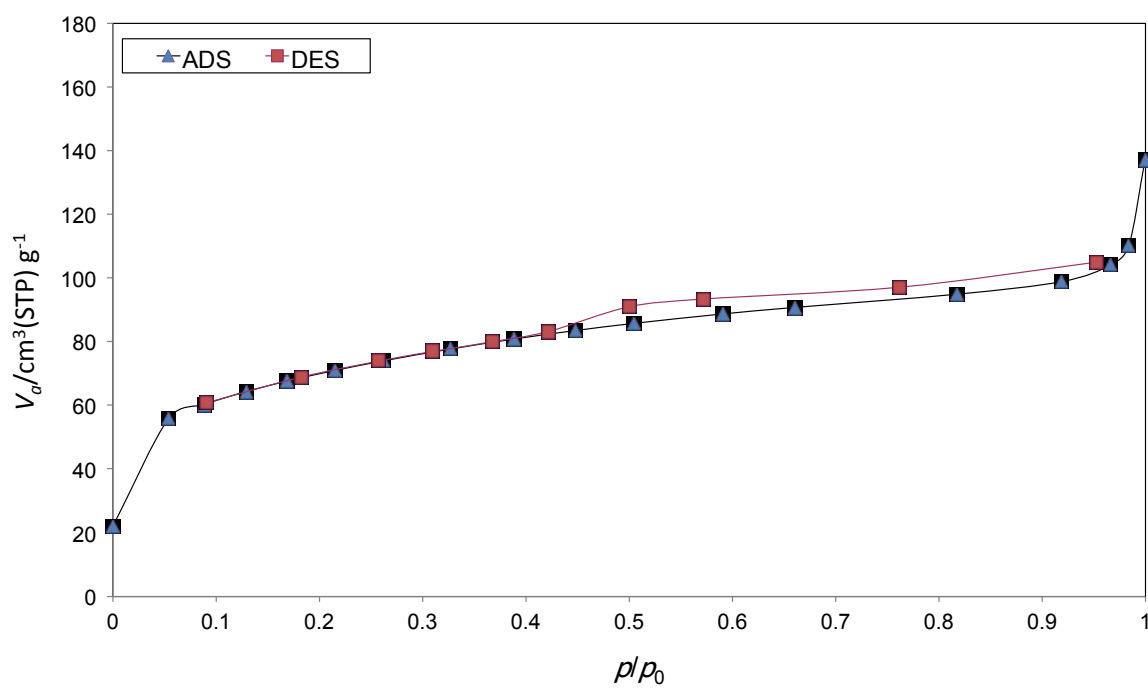

**Figure S4.** Representative N<sub>2</sub> adsorption-desorption isotherm for 40%IrO<sub>2</sub>-60%TiO<sub>2</sub>
